# Supplementary material for: The impact of human population pressure on flying fox niches and the potential consequences for Hendra virus spillover
Source: PubMed Central journal article supplement (PMC5557840; doi:10.1038/s41598-017-08065-z), 2017-08-15
Supplement: 41598_2017_8065_MOESM1_ESM.pdf [file 41598_2017_8065_MOESM1_ESM.pdf]

## Supplementary Information

The impact of human population pressure on flying fox niches and the potential consequences for Hendra virus spillover

Michael G. Walsh<sup>1</sup>, Anke Wiethoelter<sup>2</sup>, M.A. Haseeb<sup>3,4</sup>

<sup>1</sup>Marie Bashir Institute for Infectious Diseases and Biosecurity, Westmead Institute for Medical Research, University of Sydney, Westmead, New South Wales, Australia, <sup>2</sup>Faculty of Veterinary and Agricultural Sciences, University of Melbourne, Melbourne, Victoria, Australia, <sup>3</sup>Department of Epidemiology and Biostatistics, School of Public Health, <sup>4</sup>Departments of Cell Biology, Pathology and Medicine, College of Medicine, State University of New York, Downstate Medical Center, Brooklyn, New York, U.S.A.

Supplemental Table. Rasters used as landscape factors in the ecological niche modeling and point process modeling.

| Landscape raster                              | Spatial resolution | Reference | url                                                                                                                                                                                                         |
|-----------------------------------------------|--------------------|-----------|-------------------------------------------------------------------------------------------------------------------------------------------------------------------------------------------------------------|
| Mean temp during the warmest quarter          | 30 arc-second      | [17]      | <a href="http://www.worldclim.org/">http://www.worldclim.org/</a>                                                                                                                                           |
| Mean temp during the warmest quarter          | 30 arc-second      | [17]      | <a href="http://www.worldclim.org/">http://www.worldclim.org/</a>                                                                                                                                           |
| Mean precipitation during the wettest quarter | 30 arc-second      | [17]      | <a href="http://www.worldclim.org/">http://www.worldclim.org/</a>                                                                                                                                           |
| Mean precipitation during the wettest quarter | 30 arc-second      | [17]      | <a href="http://www.worldclim.org/">http://www.worldclim.org/</a>                                                                                                                                           |
| Altitude                                      | 30 arc-second      | [17]      | <a href="http://www.worldclim.org/">http://www.worldclim.org/</a>                                                                                                                                           |
| Net human migration 1970 – 1980               | 30 arc-second      | [22]      | <a href="http://sedac.ciesin.columbia.edu/data/set/popdynamics-global-est-net-migration-grids-1970-2000">http://sedac.ciesin.columbia.edu/data/set/popdynamics-global-est-net-migration-grids-1970-2000</a> |
| Net human migration 1980 – 1990               | 30 arc-second      | [22]      | <a href="http://sedac.ciesin.columbia.edu/data/set/popdynamics-global-est-net-migration-grids-1970-2000">http://sedac.ciesin.columbia.edu/data/set/popdynamics-global-est-net-migration-grids-1970-2000</a> |
| Net human migration 1990 – 2000               | 30 arc-second      | [22]      | <a href="http://sedac.ciesin.columbia.edu/data/set/popdynamics-global-est-net-migration-grids-1970-2000">http://sedac.ciesin.columbia.edu/data/set/popdynamics-global-est-net-migration-grids-1970-2000</a> |
| Human footprint                               | 30 arc-second      | [23]      | <a href="http://sedac.ciesin.columbia.edu/data/set/wildareas-v2-human-footprint-geographic">http://sedac.ciesin.columbia.edu/data/set/wildareas-v2-human-footprint-geographic</a>                           |
| Maximum Green Vegetation Fraction             | 30 arc-second      | [27]      | <a href="http://landcover.usgs.gov/green_veg.php">http://landcover.usgs.gov/green_veg.php</a>                                                                                                               |
| MODIS Land Cover Type (MCD12Q1)               | 15 arc-second      | [28]      | <a href="https://landcover.usgs.gov/global_climatology.php">https://landcover.usgs.gov/global_climatology.php</a>                                                                                           |
